# Supplementary material for: Challenges faced by people experiencing homelessness and their providers during the COVID-19 pandemic: a qualitative study
Source: PubMed Central journal article supplement — CMAJ Open. 2022 Jul 19;10(3):E685–91. doi: 10.9778/cmajo.20210334 (PMC9312992; doi:10.9778/cmajo.20210334), 2022-07-19
Supplement: open-2021-0334-original-submission.pdf [file open-2021-0334-original-submission.pdf]

# There's nowhere to go: Navigating the displacement of people experiencing homelessness during COVID-19

Kathryn Hodwitz<sup>1</sup> MSc [Kathryn.Hodwitz@unityhealth.to](mailto:Kathryn.Hodwitz@unityhealth.to)

Janet Parsons<sup>1,2,3</sup> PhD [Janet.Parsons@unityhealth.to](mailto:Janet.Parsons@unityhealth.to)

Clara Juando-Pratts<sup>1,4</sup> PhD [Clara.Juando-Prats@unityhealth.to](mailto:Clara.Juando-Prats@unityhealth.to)

Esther Rosenthal<sup>5,6</sup> MD [Esther.Rosenthal@unityhealth.to](mailto:Esther.Rosenthal@unityhealth.to)

Amy Craig-Neil<sup>7</sup> MSc [Amy.Craig-Neil@unityhealth.to](mailto:Amy.Craig-Neil@unityhealth.to)

Stephen W. Hwang<sup>7,8</sup> MD, MPH [Stephen.Hwang@unityhealth.to](mailto:Stephen.Hwang@unityhealth.to)

Joel Lockwood<sup>9,10</sup> MD [Joel.Lockwood@unityhealth.to](mailto:Joel.Lockwood@unityhealth.to)

Paul Das<sup>5,6</sup> MD, MSc [Paul.Das@unityhealth.to](mailto:Paul.Das@unityhealth.to)

Tara Kiran<sup>2,5,6,7</sup> MD, MSc [Tara.Kiran@utoronto.ca](mailto:Tara.Kiran@utoronto.ca)

<sup>1</sup> Applied Health Research Centre, Li Ka Shing Knowledge Institute, St. Michael's Hospital, Unity Health Toronto, Toronto, Ontario

<sup>2</sup> Institute of Health Policy, Management and Evaluation, University of Toronto, Toronto, Ontario

<sup>3</sup> Department of Physical Therapy and Rehabilitation Sciences Institute, University of Toronto, Toronto, Ontario

<sup>4</sup> Dalla Lana School of Public Health, University of Toronto, Toronto, Ontario

<sup>5</sup> Department of Family and Community Medicine, St. Michael's Hospital, Unity Health Toronto, Toronto, Ontario

<sup>6</sup> Department of Family and Community Medicine, Faculty of Medicine, University of Toronto, Toronto, Ontario

<sup>7</sup> MAP Centre for Urban Health Solutions, St. Michael's Hospital, Unity Health Toronto, Toronto, Ontario

<sup>8</sup> Division of General Internal Medicine, Department of Medicine, University of Toronto, Toronto, Ontario

<sup>9</sup> Division of Emergency Medicine, Faculty of Medicine, University of Toronto, Toronto, Ontario

<sup>10</sup> Department of Emergency Medicine, St. Michael's Hospital, Unity Health Toronto, Toronto, Ontario

1  
2  
3 **Send correspondence to:**  
4

5 Dr. Tara Kiran, Health Centre at 80 Bond, 80 Bond Street, Toronto, Ontario, Canada M5B 1X2;  
6 [tara.kiran@utoronto.ca](mailto:tara.kiran@utoronto.ca); phone (416) 864-3011; fax (416) 864-3099  
7  
8  
9

10 Word count: 3067

11 No tables and figures  
12  
13  
14  
15

16 **Author contributions**

17 ER, SH, JL, PD, and TK conceived the study. All authors helped design the study. KH, JP, and CJP  
18 collected and analyzed the data. KH, JP, CJP, ER, SH, JL, and TK interpreted the data. KH and TK  
19 drafted the manuscript and all authors critically reviewed it. All authors read and approved the final  
20 manuscript.  
21

22 **Funding statement**

23 This study was supported by a grant from the St. Michael's Hospital Foundation. The study sponsor had  
24 no role in study design, data collection, analysis, interpretation of data, manuscript preparation or the  
25 decision to submit for publication.  
26  
27

28 Dr. Kiran is the Fidani Chair in Improvement and Innovation at the University of Toronto. She is  
29 supported as a Clinician Scientist by the Department of Family and Community Medicine at the  
30 University of Toronto and at St. Michael's Hospital.  
31

32 **Conflicts of interest**

33 The authors declare no conflicts of interest.  
34  
35

36 **Acknowledgements**

37 Thanks to Dr. Carolyn Snider for her input into the study design and leadership in the emergency  
38 department during COVID-19 and the Community Expert Group who informed our interviews with  
39 people with lived experience of homelessness. Thanks to many others who led pandemic efforts  
40 including leaders in the emergency department and COVID-19 Assessment Centre at St. Michael's  
41 Hospital and the outreach testing in shelters done in partnership with Sherbourne Health Centre; and  
42 the tireless work of shelter staff. Finally, thank you to all the participants who shared their time and  
43 experiences with the research team.  
44  
45  
46  
47  
48  
49  
50  
51  
52  
53  
54  
55  
56  
57  
58  
59  
60

1  
2  
3 **Abstract:**  
4

5 **Background:** People experiencing homelessness are vulnerable to SARS-CoV-2 infection and its  
6  
7 consequences. However, little research has been done to understand their experiences during the  
8  
9 COVID-19 pandemic and the perspectives of healthcare workers caring for them.  
10  
11

12  
13  
14 **Methods:** We conducted an interpretivist qualitative study in Toronto, Canada. Participants were  
15  
16 patients experiencing homelessness who received COVID-19 testing, healthcare workers who worked at  
17  
18 a testing centre or emergency department, and homeless shelter staff. Using individual interviews, we  
19  
20 explored the experiences of people who were homeless during the pandemic, their interaction with  
21  
22 shelter and healthcare settings, and related system challenges. We analyzed the data inductively using  
23  
24 reflexive thematic analysis.  
25  
26  
27  
28  
29

30 **Results:** We conducted 26 interviews between December 2020 and June 2021 and identified three  
31  
32 themes. First, participants described 'Navigating the Unknown', grappling with new and evolving public  
33  
34 health guidelines that did not adequately account for homeless individuals. Second, they described  
35  
36 'Confronting Placelessness'. People experiencing homelessness often had nowhere to go due to public  
37  
38 closures, reduced shelter capacity, and a lack of isolation options. Finally, participants shared 'Struggling  
39  
40 with Powerlessness'. Patients lacked agency in their placelessness and healthcare and shelter workers  
41  
42 lacked control in the care they were able to provide leading to moral distress.  
43  
44  
45  
46  
47

48 **Interpretation:** Reduced shelter capacity, public closures, and lack of isolation options exacerbated the  
49  
50 displacement of people experiencing homelessness during COVID-19. Caring for this population amidst  
51  
52 resource constraints led to moral distress among providers. Planning for future pandemics needs to  
53  
54 account for the unique needs of those experiencing homelessness.  
55  
56  
57  
58  
59  
60

## Introduction

Homelessness has been an intractable problem for decades in Canada, the US, and elsewhere. Every night, an estimated 35,000 Canadians<sup>1</sup> and more than 500,000 Americans<sup>2</sup> are homeless. The majority live in shelters, are adult men<sup>1</sup>, and have high rates of chronic mental and physical health conditions that put them at risk for COVID-19 complications.<sup>3-5</sup> Shelter residents have been particularly vulnerable to SARS-CoV-2 infection. Physical distancing, maintaining hygiene, obtaining COVID-19 testing, and isolating when symptomatic are all difficult in shelter settings. Indeed, many shelters have had outbreaks during the pandemic, often with asymptomatic spread;<sup>6-8</sup> these outbreaks have continued despite high rates of vaccination in the general population.<sup>9</sup> Research has found people experiencing homelessness are not just more likely to test positive for COVID-19 but also experience complications and die from the infection<sup>10</sup>.

As system leaders reflect on the lessons from the pandemic, we need to learn from the lived experience of people who were homeless and those caring for them—an area that has been understudied. Some qualitative research has begun to explore the impact of COVID-19 on access to hand hygiene facilities,<sup>11</sup> health-related resources,<sup>13</sup> and primary care<sup>12</sup> for the homeless population, as well as their experiences in the first months of the pandemic<sup>14</sup> or during periods of lockdown.<sup>15</sup> However, few qualitative studies have explored the impact of pandemic policies and procedures in North America. We sought to understand the perspectives of people experiencing homelessness who interacted with emergency departments, testing centres, and shelters during the pandemic as well as the perspectives of the healthcare workers and homeless shelter staff who cared for them and bore witness to their experiences.

## Methods

### Context and Setting

Toronto is Canada's largest city with an estimated 8715 homeless individuals in 2018, 80% of whom live in the city's 75 shelter sites<sup>16</sup>. Our study included participants who worked or lived at or near St. Michael's Hospital, located close to many shelters in the downtown core. On March 16, 2020, St. Michael's opened one of Ontario's COVID-19 Assessment Centres (CACs), providing free COVID-19 testing to any members of the public. The CAC was open during daytime hours; people were directed to the St. Michael's emergency department (ED) if they required a test after-hours or needed a more thorough medical assessment. Beginning on April 23, 2020, St. Michael's CAC and community partners began doing mobile outreach testing at local shelters under the direction of public health authorities<sup>6</sup>.

### Study design and participants

We conducted an interpretivist qualitative study<sup>17</sup> and conducted a reflexive thematic analysis of the data,<sup>18</sup> aiming to understand participants' experiences and the meanings they assigned to them. We focused on four groups of participants: people experiencing homelessness who had received COVID-19 testing through shelter outreach, healthcare workers who worked in the ED or CAC, healthcare leaders who oversaw CAC or ED operations during the pandemic, and managers of homeless shelters where mobile testing occurred.

Using in-depth individual interviews (conducted by KH, JAP, and CJP, female researchers), we explored participants' perspectives of COVID-19 testing, the procedures surrounding testing, and the broader challenges facing people experiencing homelessness during the pandemic. Interviews were conducted

1  
2  
3 online or by telephone from December 2020 to June 2021. Interviews were 30-60 minutes in length and  
4  
5 were audio recorded and transcribed verbatim. The interview guides were created by the team. The  
6  
7 patient interview guide was reviewed by a Community Expert Group comprised of people with lived  
8  
9 experience of homelessness via a virtual meeting.  
10  
11  
12  
13

14 Ethics approval was granted from the Unity Health Toronto Research Ethics Board.  
15  
16  
17

### 18 Participant recruitment

19  
20  
21  
22

23 We used convenience sampling to recruit patients. Homeless individuals who received mobile outreach  
24  
25 testing through St. Michael's hospital and who consented to be contacted for future research  
26  
27 opportunities, were contacted by telephone and invited to participate in this study. We also contacted  
28  
29 representatives at shelters involved in mobile testing and asked them to share recruitment flyers with  
30  
31 patients who had consented; flyers instructed shelter residents to contact the study team. We  
32  
33 scheduled telephone interviews with everyone who agreed to participate.  
34  
35  
36  
37  
38

39 We used a mix of purposive and convenience sampling<sup>19</sup> to recruit the remaining participants. We  
40  
41 invited select healthcare leaders to participate via email. We then asked them to recommend HCWs in  
42  
43 the CAC and ED who supported people experiencing homelessness and send recruitment emails to those  
44  
45 individuals, and their teams, on our behalf. We also sent recruitment emails to managers and directors  
46  
47 of shelters that were involved in mobile testing. Where possible, we selected participants to maximize  
48  
49 diversity in roles and experiences. All participants, except healthcare leaders, were given honorariums.  
50  
51  
52  
53

### 54 Analysis

55  
56  
57  
58  
59  
60

1  
2  
3  
4  
5 We concurrently generated and analyzed data using reflexive thematic analysis,<sup>18, 20–21</sup> which involves  
6  
7 reading the transcripts, inductively coding the data, and grouping the codes into interpretive themes  
8  
9 reflecting commonalities in participants' experiences. The analysis was led by KH, in collaboration with  
10  
11 JAP and CJP, who are all experienced qualitative researchers, with iterative input from the full team of  
12  
13 clinicians, methodologists, and content experts.  
14  
15  
16  
17

18  
19 KH first coded the data by participant group using NVivo, and brought initial codes and reflections to JAP  
20  
21 and CJP for discussion. KH then generated cross-cutting themes through constant comparison of the  
22  
23 data and iterative analytical discussions with JAP and CJP. Theme descriptions and accompanying codes  
24  
25 were presented to the remaining authors for additional interpretation and refinement. The themes  
26  
27 were iteratively updated and data collection and analysis continued until the team agreed we had  
28  
29 reached thematic sufficiency. We engaged in reflexivity throughout this process, continuously  
30  
31 questioning our assumptions and viewing the data from multiple perspectives.  
32  
33  
34  
35  
36  
37  
38

## 39 **Results**

40  
41  
42  
43 We interviewed 26 participants, including: 11 patients experiencing homelessness residing at one of 3  
44  
45 shelters, all men with a mean age of 52.4 (range 28-68); 9 HCWs involved in COVID-19 testing, including  
46  
47 physicians, nurses, clinical support staff, and administrative support staff, mean age 40.8 (range 33-59);  
48  
49 4 HC leaders; and 2 managers of different homeless shelters. We generated three cross-cutting themes  
50  
51 described below.  
52  
53  
54  
55  
56  
57  
58  
59  
60

1  
2  
3  
4  
5  
6  
7  
8 **Navigating the Unknown**  
9

10  
11  
12 *“We were all in the dark. Nobody had any idea what to anticipate*  
13 *and the whole world shut down.” HCW05*  
14  
15  
16  
17  
18

19 Participants spoke about uncertainty that was pervasive, particularly in the early months of the  
20 pandemic. HCWs and shelter managers highlighted how knowledge of the virus and how to confront it  
21 was constantly evolving along with relevant public health guidance. Shelter managers also expressed  
22 their uncertainty in how to follow directives that did not easily apply in their context:  
23  
24  
25  
26  
27  
28  
29

30 *“One of the first things that was talked about was physical distancing. So what do you do when*  
31 *you've got a congregate setting of almost 600 people in dorm style?... What does it look like to*  
32 *isolate somebody who [has a history of substance use] or who has a psychotic disorder or who*  
33 *has liver failure or who's in our managed alcohol program? It's not so easy.” ShelterManager02*  
34  
35  
36  
37  
38  
39  
40

41 Hospital leaders described the uncertainty they faced developing processes when “there was really no  
42 rulebook” (HCLLeader01). HCWs who needed to follow these protocols noted how directives changed  
43 rapidly, leaving them unsure how to respond on a given day. They also described problem-solving in the  
44 absence of clear guidelines, most notably supporting patients experiencing homelessness who could not  
45 self-isolate:  
46  
47  
48  
49  
50  
51

52 *“And then [we] dealt with ‘where does this patient go?’ So we'll just put them in our waiting*  
53  
54  
55  
56  
57  
58  
59  
60



1  
2  
3 room to wait, but it put a lot of pressure on the emergency department... we didn't know where  
4  
5 to send people because there was no real clear communication [about that]." HCW09  
6  
7  
8  
9

10 HCWs noted that patients experiencing homelessness were often unaware of protocols, and would  
11  
12 sometimes arrive at the testing centre or hospital not knowing they would be unable to return to their  
13  
14 shelter while awaiting test results.  
15  
16  
17  
18

19 In trying to provide safe and effective care amidst so many unknowns, HCWs and shelter staff spoke  
20  
21 about the intense stress they experienced early in the pandemic:  
22  
23  
24

25 "The emergency department at the time felt a bit like a ticking time bomb. It was tense. Because  
26  
27 there were a lot of people [there], and we didn't know that much about the virus, none of us  
28  
29 were vaccinated at the time... It was a stressful period, that's for sure." HCW08  
30  
31  
32  
33  
34

### 35 **Confronting 'Placelessness'**

36  
37  
38

39 *"The general order is stay at home. [But] what if you don't have a home to stay?" Patient05*  
40  
41  
42  
43

44 Participants highlighted the pervasive 'placelessness' of people experiencing homelessness throughout  
45  
46 the pandemic. This was most acute in the early pandemic when test results could take three to seven  
47  
48 days and HCWs needed to make space in the ED for patients to stay while awaiting results:  
49  
50  
51  
52

53 "The ED basically became an area that took over lodging and feeding of people that were  
54  
55 homeless who were not able to go to the shelter system anymore because there [were]  
56  
57  
58  
59  
60

1  
2  
3 concerns that they were infected with COVID or that they were in close contact [with someone  
4 who was]. And early in the pandemic, the infrastructure wasn't set up for the city to manage  
5 homeless shelters... so it ended up falling on the [COVID Assessment Centre], of which then it  
6 sort of fell back on the Emerg.” HCLLeader02  
7  
8  
9  
10  
11  
12  
13

14 Patients spoke about a broader sense of displacement they felt throughout the pandemic due to  
15 physical restrictions both inside and outside their shelters. In shelters, certain common rooms were  
16 closed and sometimes bedrooms needed to be vacated for extended periods for enhanced cleaning  
17 protocols. This reportedly led to residents congregating in hallways while bedrooms and common spaces  
18 were inaccessible. Patients also noted being limited in where they could go outside their shelters at this  
19 time due to widespread closures of public places:  
20  
21  
22  
23  
24  
25  
26  
27  
28  
29

30 “When you're in a shelter, you're allowed to be inside for a certain period of time and you've  
31 got to be out for a certain period of time. Well, where do you go? Everything's closed.”  
32  
33

34 Patient11  
35  
36  
37  
38

39 HCWs noted that ongoing public closures exacerbated the vulnerability of homeless individuals by  
40 reducing access to other healthcare or social supports:  
41  
42  
43  
44  
45

46 “For somebody who was homeless and living on the streets, it became a really dire situation for  
47 them. They were already in a crisis situation, and then on top of that, you're compounding all  
48 these other issues where they can't access their caseworkers, they can't access mental health,  
49 they can't access their medications... It really started to pile up and it was a pretty tough time.”  
50  
51  
52  
53

54 HCW05  
55  
56  
57  
58  
59  
60

1  
2  
3  
4  
5 One participant noted that these closures not only limited people’s access to services but potentially  
6 destabilized them psychologically, as the physical and emotional connections that comprised their lives  
7 were suddenly unavailable to them. Some participants linked the cumulative impact of such  
8 destabilization to increased mental health issues and opioid-related deaths among shelter residents.  
9  
10 Some also noted that many of these issues are longstanding, but were exacerbated and illuminated by  
11 the pandemic:  
12  
13  
14  
15  
16  
17  
18  
19  
20

21 “People dealing with severe mental health issues, with trauma, with substance abuse issues...  
22 One of the important things that keeps those people stable, to some extent... [is] connections...  
23 Once COVID shut everything down... all of those folks weren't able to connect with the life that  
24 they built.” HCW06  
25  
26  
27  
28  
29  
30  
31  
32

### 33 **Struggling with Powerlessness**

34  
35  
36  
37 *“At the end of the day, we're there for the clients that we serve.*

38  
39 *So you have to just keep showing up.” ShelterManager02*  
40  
41  
42  
43

44 HCW participants spoke extensively about the lack of control they felt in providing adequate care for  
45 patients experiencing homelessness, noting the tension they felt in the care they could offer versus the  
46 care they wished they could give:  
47  
48  
49  
50  
51  
52

53 “The patient might have been going through severe withdrawal... and once that was taken care  
54 of, the person was put into a makeshift shelter [in the ED] and we sort of looked after them that  
55  
56  
57  
58  
59  
60

1  
2  
3 way. But really 'looking after them' was you maybe hand them a meal or you spoke to them  
4  
5 from a distance to say, 'Hey, do you need anything?'... But they couldn't leave, they couldn't go  
6  
7 anywhere... It was horrible." HCW06  
8  
9

10  
11  
12 One participant described the distress of needing to discharge patients once the ED reached capacity,  
13  
14 even if they did not have anywhere else to go:  
15  
16

17  
18 "If we were at max capacity, and somebody came in and their COVID swab came back negative,  
19  
20 we still were not able to obtain a shelter but we basically had no other choice but to discharge  
21  
22 them... And it became very difficult and disheartening at times." HCW05  
23  
24  
25

26  
27  
28 Shelter managers also conveyed their lack of control in effectively serving residents, given the lack of  
29  
30 supports available to them:  
31  
32

33  
34 "People with mental health issues rapidly decompensated because their supports were taken  
35  
36 away... We could see people getting more and more sick on the streets, decompensating,  
37  
38 knowing that the only thing we could do is call the police and tell them we need a mental health  
39  
40 team to respond." ShelterManager01  
41  
42  
43

44  
45  
46 Ultimately, these participants felt limited in their abilities, as if they were "caught in the middle of the  
47  
48 process" (HCW07), without agency:  
49  
50

51  
52 "We were the messenger, and that was hard. Because understandably, [patients] were  
53  
54 extremely angry. But underneath that anger was fear... And we were managing that in a space  
55  
56  
57

1  
2  
3 where we, too, felt really overwhelmed by the responsibility, that we were the last resort.”

4  
5 HCLLeader04  
6  
7  
8  
9

10 Moreover, HCWs spoke about the psychological toll of witnessing patients’ powerlessness throughout  
11 the pandemic:  
12  
13  
14  
15

16 “Every time we saw someone at the COVID Center that came for a test and perhaps they  
17 weren’t aware that they were going back to their shelter because, until they received the  
18 results, they were not welcome back. So often we were the folks telling them, ‘Hey, listen,  
19 you’re not going back to your home. You are staying with us. We actually don’t know where  
20 you’re going to go. You might need to stay at the emergency department. We don’t know how  
21 long you’re going stay there.’... Those are some of the biggest challenges I think we  
22 experienced.” HCLLeader01  
23  
24  
25  
26  
27  
28  
29  
30  
31  
32  
33

34 In contrast, patients described a different kind of powerlessness. They spoke relatively positively about  
35 healthcare interactions, noting that the testing they received at their shelters was “very  
36 straightforward” (Patient08) and that they had “no complaints” (Patient05) about staying in an isolation  
37 hotel. However, some expressed frustration about the ongoing restrictions and general atmosphere  
38 within shelters conveying a sense of powerlessness:  
39  
40  
41  
42  
43  
44  
45  
46  
47

48 “There’s a culture here [in the shelter]... If you want to start complaining, it feels like, because  
49 they are in charge of some of the grants for our rent, housing, they feel like we cannot do  
50 nothing about it... they feel like we don’t have a voice. And at the same time, you don’t want to  
51 get kicked out of here... And that’s why I was struggling.” Patient08  
52  
53  
54  
55  
56  
57  
58  
59  
60

1  
2  
3  
4  
5 Other patients, conversely, spoke positively of their shelter experience and seemed to recognize the  
6  
7 powerlessness of shelter staff during this time. When asked about what other supports might help  
8  
9 people experiencing homelessness during a pandemic, most could not identify any, instead conveying a  
10  
11 sense of relative gratitude for their situation:  
12  
13

14  
15  
16 “I never have any serious problems with anything here, with what the shelter has to offer.  
17  
18 They're doing the best they can with what they have... They're helping me out as best they can,  
19  
20 and I'm grateful for that.” Patient03  
21  
22  
23  
24

## 25 **Interpretation**

26  
27  
28  
29  
30 For years, our health and social systems have struggled to meet the needs of people experiencing  
31  
32 homelessness. Our qualitative study provides a nuanced picture of how the pandemic heightened  
33  
34 existing challenges. Participants described how COVID-19 exacerbated the placelessness of an already  
35  
36 destabilized population. With the closure of public spaces and restrictions within shelter settings, people  
37  
38 experiencing homelessness literally had nowhere to go. Early on, shelter residents who required self-  
39  
40 isolation often ended up with unplanned overnight stays in the emergency department because there  
41  
42 were no other systems in place. Both patients and providers felt they were left to navigate the  
43  
44 uncertainty of the pandemic on their own and felt powerless in their situation. Shelter and healthcare  
45  
46 workers described directives and resource constraints that prevented them from delivering the kind of  
47  
48 care they wanted to provide.  
49  
50  
51  
52  
53  
54  
55  
56  
57  
58  
59  
60

1  
2  
3 Our findings are consistent with other research that has highlighted the compounding marginalization of  
4 homeless populations during the pandemic. People experiencing homelessness were more likely to  
5 acquire COVID-19, become seriously ill, and die from the infection.<sup>14,22</sup> Others have also described  
6 increased food insecurity due to widespread closures,<sup>14</sup> a loss of ‘place’ amidst restrictions and  
7 distanced services,<sup>23</sup> a rise in overdose deaths,<sup>24</sup> and increased fear, confusion, and uncertainty.<sup>14,23</sup> In  
8 some regions, vaccinations have been slow to reach people living in shelters, leading to outbreaks even  
9 while other parts of the population were protected<sup>25</sup>.

10  
11  
12 Healthcare workers and shelter staff in our study faced an emotional toll from trying to care for patients  
13 experiencing homelessness within a system that did not adequately support their efforts. Other  
14 researchers have described the adverse psychological impacts of COVID-19 on frontline healthcare  
15 workers<sup>22,26-30</sup> and the rise of moral distress—being unable to take the right or ethical course of action  
16 because of institutionalized obstacles.<sup>31-34</sup> Moral distress can in turn lead to burnout<sup>33</sup> and intention to  
17 resign,<sup>34</sup> both notable trends in recent surveys.<sup>35-36</sup> These effects on the workforce may make it even  
18 more challenging for people experiencing homelessness to receive the care they need in the future. In  
19 our study, people experiencing homelessness seemed less distressed about their circumstances than  
20 those caring for them which may relate to differing expectations.

21  
22  
23 Our study has limitations. First, we focused on the experiences of participants in one geographic region  
24 and were only able to recruit male patient participants which limits the generalizability of our findings.  
25 Second, there were temporal differences in what participants explored which may have impacted  
26 thematic sufficiency. Some highlighted early pandemic experiences while others reflected circumstances  
27 at the time of the interview, almost one year into the pandemic.

1  
2  
3 Our findings highlight that our society needs to do better to meet the needs of people experiencing  
4 homelessness now and in future pandemics. During interviews, participants spoke about some of the  
5 system changes required including better communication and collaboration between stakeholders,  
6 centralized oversight of the response, more mental health and addiction supports, and most  
7 importantly, housing integrated with social supports. These suggestions did not reach thematic  
8 sufficiency in our study but should be explored in future research that guides pandemic planning. On the  
9 one hand, the pandemic has exposed the limitations of shelters as even a temporizing solution to  
10 homelessness. On the other hand, it has shown us that we can use existing infrastructure, such as  
11 unused hotel rooms, to rapidly house people.<sup>37</sup> Ultimately, a better pandemic response would include  
12 creative solutions to end homelessness.<sup>38</sup>  
13  
14  
15  
16  
17  
18  
19  
20  
21  
22  
23  
24  
25  
26  
27  
28  
29  
30  
31  
32  
33  
34  
35  
36  
37  
38  
39  
40  
41  
42  
43  
44  
45  
46  
47  
48  
49  
50  
51  
52  
53  
54  
55  
56  
57  
58  
59  
60



## References

1. Gaetz S, DeJ E, Richter T, Redman M. *The State of Homelessness in Canada 2016*. Toronto: Canadian Observatory on Homelessness Press. 2016. <https://www.homelesshub.ca/SOHC2016>
2. Henry M, Watt R, Mahathey A, Ouellette J, Sitler A. The 2019 annual homeless assessment report (AHAR) to Congress. Part 1: Point-in-time estimates of homelessness [internet]. United States: 2020.[access at: July 31, 2020].
3. Tsai J, Wilson M. COVID-19: a potential public health problem for homeless populations. *The Lancet Public Health*. 2020;5(4):e186-e187. doi:10.1016/S2468-2667(20)30053-0
4. Perri M, Dosani N, Hwang SW. COVID-19 and people experiencing homelessness: challenges and mitigation strategies. *CMAJ*. 2020;192(26):E716-E719. doi:10.1503/cmaj.200834.
5. National Academies of Sciences, Engineering and Medicine. Evidence of effect of permanent supportive housing on health. *Permanent supportive housing: Evaluating the evidence for improving health outcomes among people experiencing chronic homelessness*. Washington DC: National Academies Press; 2018. [https://www.ncbi.nlm.nih.gov/books/NBK519594/pdf/Bookshelf\\_NBK519594.pdf](https://www.ncbi.nlm.nih.gov/books/NBK519594/pdf/Bookshelf_NBK519594.pdf)
6. Kiran T, Craig-Neil A, Das P, et al. Factors associated with SARS-CoV-2 positivity in 20 homeless shelters in Toronto, Canada, from April to July 2020: a repeated cross-sectional study. *CMAJ Open*. 2021; 9(1):E302-E308. doi:10.9778/cmajo.20200253
7. Baggett TP, Keyes H, Sporn N, Gaeta JM. Prevalence of SARS-CoV-2 infection in residents of a large homeless shelter in Boston. *JAMA*. 2020;323(21):2191-2192. doi:10.1001/jama.2020.6887
8. Mosites E, Parker EM, Clarke KE, et al. Assessment of sars-cov-2 infection prevalence in homeless shelters—four us cities, march 27–april 15, 2020. *Morbidity and Mortality Weekly Report*. 2020;69(17):521-522.
9. <https://globalnews.ca/news/7948916/covid-19-outbreak-waterloo-region-congregate-setting/>
10. Richard L, Booth R, Rayner J, Clemens KK, Forchuk C, Shariff SZ. Testing, infection and complication rates of COVID-19 among people with a recent history of homelessness in Ontario, Canada: a retrospective cohort study. *CMAJ Open*. 2021;9(1):E1-E9. doi:10.9778/cmajo.20200287
11. Montgomery MP, Carry MG, Garcia-Williams AG, et al. Hand hygiene during the COVID-19 pandemic among people experiencing homelessness—Atlanta, Georgia, 2020. *Journal of Community Psychology*. 2021; 49(7): 2441-2453.
12. Howells K, Burrows M, Amp M, et al. Exploring the experiences of changes to support access to primary health care services and the impact on the quality and safety of care for homeless people during the COVID-19 pandemic: a study protocol for a qualitative mixed methods approach. *International Journal for Equity in Health*. 2021;20(1). Art.29 doi:10.1186/s12939-020-01364-4
13. Allaria C, Loubière S, Mosnier E, Monfardini E, Auquier P, Tinland A. “Locked down outside”: Perception of hazard and health resources in COVID-19 epidemic context among homeless people. *SSM - Population Health*. 2021;15. doi:10.1016/j.ssmph.2021.100829
14. de Paula HC, Daher DV, Koopmans FF, Faria MG de A, Lemos PFS, Moniz M de A. No place to shelter: ethnography of the homeless population in the COVID-19 pandemic. *Revista brasileira de enfermagem*. 2020;73: e20200489. doi:10.1590/0034-7167-2020-0489

1  
2  
3  
4  
5  
6  
7  
8  
9  
10  
11  
12  
13  
14  
15  
16  
17  
18  
19  
20  
21  
22  
23  
24  
25  
26  
27  
28  
29  
30  
31  
32  
33  
34  
35  
36  
37  
38  
39  
40  
41  
42  
43  
44  
45  
46  
47  
48  
49  
50  
51  
52  
53  
54  
55  
56  
57  
58  
59  
60

15. Bhattacharya P, Khemka GC, Roy L, Roy SD. Social injustice in the neoliberal pandemic era for homeless persons with mental illness: A qualitative inquiry from India. *Frontiers in Psychiatry*. 2021;12: 635715. doi:10.3389/fpsyt.2021.635715
16. City of Toronto. Toronto street needs assessment 2018 results report (Canadian Observatory on Homelessness/Homeless Hub, Toronto). 2018. Available: [www.homelesshub.ca/resource/toronto-street-needs-assessment-2018-results-report](http://www.homelesshub.ca/resource/toronto-street-needs-assessment-2018-results-report). accessed 2020 Sept 14.
17. Weaver K, Mn BN, Olson JK. Understanding paradigms used for nursing research. *Journal of Advanced Nursing*. 2006;53(4):459-469.
18. Braun V, Clarke V. Reflecting on reflexive thematic analysis. *Qualitative Research in Sport, Exercise and Health*. 2019;11(4):589-597. doi:10.1080/2159676X.2019.1628806
19. Green J, Thorogood N. *Qualitative Methods for Health Research*. Los Angeles: Sage. 2014.
20. Clarke V, Braun V. Thematic analysis. *Journal of Positive Psychology*. 2017;12(3):297-298. doi:10.1080/17439760.2016.1262613
21. Braun V, Clarke V. Using thematic analysis in psychology. *Qualitative Research in Psychology*. 2006;3(2):77-101. doi:10.1191/1478088706qp063oa
22. Pedrosa AL, Bitencourt L, Fróes ACF, et al. Emotional, behavioral, and psychological impact of the COVID-19 pandemic. *Frontiers in Psychology*. 2020;11: 566212. doi:10.3389/fpsyg.2020.566212
23. Parkes T, Carver H, Masterton W, et al. 'They already operated like it was a crisis, because it always has been a crisis': a qualitative exploration of the response of one homeless service in Scotland to the COVID-19 pandemic. *Harm Reduction Journal*. 2021;18(1): 26 doi:10.1186/s12954-021-00472-w
24. Baral S, Bond A, Boozary A, et al. Seeking shelter: homelessness and COVID-19. *FACETS*. 2021;6:925-958. doi:10.1139/facets-2021-0004
25. <https://globalnews.ca/news/7948916/covid-19-outbreak-waterloo-region-congregate-setting/>
26. Zhang WR, Wang K, Yin L, et al. Mental health and psychosocial problems of medical health workers during the COVID-19 epidemic in China. *Psychotherapy and Psychosomatics*. 2020;89(4):242-250. doi:10.1159/000507639
27. Pfefferbaum B, North CS. Mental health and the Covid-19 pandemic. *New England Journal of Medicine*. 2020;383(6):510-512. doi:0.1056/NEJMp2008017
28. Pappa S, Ntella V, Giannakas T, Giannakoulis VG, Papoutsis E, Katsaounou P. Prevalence of depression, anxiety, and insomnia among healthcare workers during the COVID-19 pandemic: A systematic review and meta-analysis. *Brain, Behavior, and Immunity*. 2020;88:901-907. doi:10.1016/j.bbi.2020.05.026
29. Jalili M, Niroomand M, Hadavand F, Zeinali K, Fotouhi A. Burnout among healthcare professionals during COVID-19 pandemic: a cross-sectional study. *International Archives of Occupational and Environmental Health*. Published online 2021. doi:10.1007/s00420-021-01695-x
30. Khan KS, Mamun MA, Griffiths MD, Ullah I. The mental health impact of the COVID-19 pandemic across different cohorts. *International Journal of Mental Health and Addiction*. Published online 2020. doi:10.1007/s11469-020-00367-0

- 1  
2  
3 31. Sheather J, Fidler H. Covid-19 has amplified moral distress in medicine. *BMJ*. 2021;372:n28  
4 doi:10.1136/bmj.n28  
5
- 6 32. Lamiani G, Borghi L, Argentero P. When healthcare professionals cannot do the right thing: A systematic  
7 review of moral distress and its correlates. *Journal of Health Psychology*. 2017;22(1):51-67.  
8 doi:10.1177/1359105315595120  
9
- 10 33. Hines SE, Chin KH, Glick DR, Wickwire EM. Trends in moral injury, distress, and resilience factors among  
11 healthcare workers at the beginning of the covid-19 pandemic. *International Journal of Environmental  
12 Research and Public Health*. 2021;18(2):1-11. doi:10.3390/ijerph18020488  
13
- 14 34. Epstein EG, Whitehead PB, Prompahakul C, Thacker LR, Hamric AB. Enhancing understanding of moral  
15 distress: The measure of moral distress for health care professionals. *AJOB Empirical Bioethics*.  
16 2019;10(2):113-124. doi:10.1080/23294515.2019.1586008  
17
- 18 35. Melissa Couto Zuber. Nearly 75 per cent of Ontario doctors experienced burnout during pandemic,  
19 survey finds. *The Canadian Press* August 18, 2021  
20
- 21 36. Etz R, Larry A. Green Center Advisory Group. Quick covid-19 primary care survey, series 29. July 27,  
22 2021. <https://deepblue.lib.umich.edu/handle/2027.42/168418> . Accessed August 23, 2021.  
23
- 24 37. [https://www.toronto.ca/news/city-of-toronto-covid-19-response-for-people-experiencing-  
25 homelessness/](https://www.toronto.ca/news/city-of-toronto-covid-19-response-for-people-experiencing-homelessness/)  
26
- 27 38. Hwang, S. (September 28, 2020). It is possible to end chronic homelessness if we act now. *Globe and  
28 Mail*  
29  
30  
31  
32  
33  
34  
35  
36  
37  
38  
39  
40  
41  
42  
43  
44  
45  
46  
47  
48  
49  
50  
51  
52  
53  
54  
55  
56  
57  
58  
59  
60
